# Supplementary material for: Developing and implementing National Health Insurance: learnings from the first try in Benin
Source: HighWire-hosted journal article supplement (doi:10.1136/bmjgh-2022-009027), 2022-11-01
Supplement: bmjgh-2022-009027supp001_data_supplement.pdf [file bmjgh-2022-009027supp001_data_supplement.pdf]

**APPENDIX**

## Appendix 1 : Details of study participants' job roles and level of experience

|                       | ID | Job roles                                                  |
|-----------------------|----|------------------------------------------------------------|
| Ministries of Health  | 1  | Senior policy makers                                       |
|                       | 2  | Senior policy makers                                       |
|                       | 3  | General hospital director                                  |
|                       | 4  | Policy maker                                               |
| Other Ministries      | 1  | Senior policy makers (Ministry of social Affairs)          |
|                       | 2  | Senior finance manager (Ministry of finance)               |
| NHI-Agency            | 1  | Managing staffs                                            |
|                       | 2  | Managing staffs                                            |
|                       | 3  | Senior policy maker                                        |
|                       | 4  | Senior policy maker                                        |
|                       | 5  | Finance manager                                            |
| TWG-NHI               | 1  | Senior policymaker/programme manager/ Development partners |
|                       | 2  | Health economist & Health policy                           |
|                       | 3  | Managers of private health insurance                       |
|                       | 4  | Representative of trade union                              |
| Health care providers | 1  | Senior health district manager                             |
|                       | 2  | Hospital managers                                          |
|                       | 3  | Hospital managers                                          |
|                       | 4  | Health care facilities managers                            |
|                       | 5  | Health care facilities managers                            |

Note: To preserve confidentiality, participants have been categorised by level of seniority and job roles. .

## Appendix 2: Selected socio-economic indicators including health.

| <b>Indicators</b>                                                     | <b>Values (2008)</b>        |
|-----------------------------------------------------------------------|-----------------------------|
| <b><i>Socioeconomics indicators</i></b>                               |                             |
| Economic growth rate (%)                                              | 5.00                        |
| Inflation rate (%)                                                    | 7.9%                        |
| The poverty rate (%)                                                  | 37.5                        |
| GINI index (%)                                                        | 43.44                       |
| <b><i>Health indicators</i></b>                                       |                             |
| Health expenditure, public (% of government expenditure)              | 9.27                        |
| Health expenditure, public (% of total health expenditure)            | 50.95                       |
| Hospital beds (per 1,000 peoples)                                     | 0.5                         |
| Out of pocket health expenditure (% of private expenditure on health) | 91.14                       |
| Out of pocket health expenditure (% of total expenditure on health)   | 44.71                       |
| Improved water sources (% population with access)                     | 73.7                        |
| Birth rate, crude, per 1,000 people)                                  | 38.36                       |
| Cause death, by non-communicable diseases (% of total)                | 26.1                        |
| life expectancy (years)                                               | 60                          |
| proportion of births attended by skilled personnel (%)                | 77                          |
| under-5 mortality rate (‰)                                            | 99                          |
| Incidence of catastrophic health expenditure ( )                      | 10                          |
| External sources in (% of total health expenditure)                   | 24.3                        |
| <b><i>Social movements</i></b>                                        |                             |
| Number of strikes by trade union of civil servants                    | 2 in (2007) and 5 in (2008) |
| WDI (2016) and WTO (2019)                                             |                             |
